# Supplementary material
Source: ML conference proceedings conference paper supplement (https://openreview.net/forum?id=ySFGlFjgIfN)
Supplement: supplementary_material [file attachment]

## Checklist

1. For all authors...
  - (a) Do the main claims made in the abstract and introduction accurately reflect the paper’s contributions and scope? [\[Yes\]](#)
  - (b) Did you describe the limitations of your work? [\[Yes\]](#) *See Conclusion, in the section titled Limitations and Impact*
  - (c) Did you discuss any potential negative societal impacts of your work? [\[Yes\]](#) *See Conclusion, in the section titled Limitations and Impact*
  - (d) Have you read the ethics review guidelines and ensured that your paper conforms to them? [\[Yes\]](#)
2. If you are including theoretical results...
  - (a) Did you state the full set of assumptions of all theoretical results? [\[Yes\]](#)
  - (b) Did you include complete proofs of all theoretical results? [\[Yes\]](#)
3. If you ran experiments...
  - (a) Did you include the code, data, and instructions needed to reproduce the main experimental results (either in the supplemental material or as a URL)? [\[Yes\]](#) *Our code will be included in the supplemental material.*
  - (b) Did you specify all the training details (e.g., data splits, hyperparameters, how they were chosen)? [\[Yes\]](#) *See Appendix E.1.5 and E.2.*
  - (c) Did you report error bars (e.g., with respect to the random seed after running experiments multiple times)? [\[Yes\]](#) *All plots showing results display means over multiple evaluation episodes per agent (i.e., seed) and over multiple seeds. They also show standard error of the mean over random seeds.*
  - (d) Did you include the total amount of compute and the type of resources used (e.g., type of GPUs, internal cluster, or cloud provider)? [\[Yes\]](#) *See Appendix, Section E.3*
4. If you are using existing assets (e.g., code, data, models) or curating/releasing new assets...
  - (a) If your work uses existing assets, did you cite the creators? [\[Yes\]](#) *See Appendix Section E.1.5*
  - (b) Did you mention the license of the assets? [\[Yes\]](#) *See Appendix Section E.1.5*
  - (c) Did you include any new assets either in the supplemental material or as a URL? [\[Yes\]](#) *Our code will be included in the supplemental material.*
  - (d) Did you discuss whether and how consent was obtained from people whose data you’re using/curating? [\[N/A\]](#)
  - (e) Did you discuss whether the data you are using/curating contains personally identifiable information or offensive content? [\[N/A\]](#)
5. If you used crowdsourcing or conducted research with human subjects...
  - (a) Did you include the full text of instructions given to participants and screenshots, if applicable? [\[N/A\]](#)
  - (b) Did you describe any potential participant risks, with links to Institutional Review Board (IRB) approvals, if applicable? [\[N/A\]](#)
  - (c) Did you include the estimated hourly wage paid to participants and the total amount spent on participant compensation? [\[N/A\]](#)
